# Supplementary material for: The Metabolomic Signature of Opa1 Deficiency in Rat Primary Cortical Neurons Shows Aspartate/Glutamate Depletion and Phospholipids Remodeling
Source: PubMed Central journal article supplement (PMC6465244; doi:10.1038/s41598-019-42554-7), 2019-04-15

**THE METABOLOMIC SIGNATURE OF OPA1 DEFICIENCY  
IN RAT PRIMARY CORTICAL NEURONS SHOWS ASPARTATE/GLUTAMATE  
DEPLETION AND PHOSPHOLIPIDS REMODELING**

Juan Manuel Chao de la Barca, Macarena S. Arrázola, Cinzia Bocca, Laetitia Arnauné-Pelloquin, Olga Iuliano, Guillaume Tcherkez, Guy Lenaers, Gilles Simard, Pascale Belenguer, Pascal Reynier

| Biochemical family                      |                                   | Number of metabolites | Method used for quantitation |           |
|-----------------------------------------|-----------------------------------|-----------------------|------------------------------|-----------|
| Carnitine (C0) and acyl-carnitines (AC) |                                   | 40                    | FIA-MS/MS                    |           |
| Amino acid (AA)                         |                                   | 21                    | LC-MS/MS                     |           |
| Biogenic amine (BA)                     |                                   | 21                    | LC-MS/MS                     |           |
| Hexose (H1)                             |                                   | 1                     | FIA-MS/MS                    |           |
| Lipids                                  | Lysophosphatidylcholine (lyso PC) | 14                    | FIA-MS/MS                    |           |
|                                         | Phosphatidylcholine (PC)          | Diacyl-PC (PC aa)     | 38                           | FIA-MS/MS |
|                                         |                                   | Alkyl-acyl-PC (PC ae) | 38                           | FIA-MS/MS |
|                                         | Sphingomyelins (SM)               | 15                    | FIA-MS/MS                    |           |

**Supplementary Table 1.** Biochemical families of metabolites quantified in Biocrates® Absolute IDQ p180 kit. FIA-MS/MS: Flow Injection Analysis-Tandem mass spectrometry. LC-MS/MS: Liquid Chromatography-Tandem mass spectrometry.

| <b>Ratio or sum</b>                                                                           | <b>Metabolic significance</b>                                          |
|-----------------------------------------------------------------------------------------------|------------------------------------------------------------------------|
| <b>Ratio of asymmetrically demethylated arginine to total unmodified arginine (ADMA/Arg)</b>  | Inhibition of nitric oxide synthase (NOS)                              |
| <b>Ratio of total demethylated arginine to total unmodified arginine (Total DMA/Arg)</b>      | Activity of protein arginine methyl transferase                        |
| <b>Ratio of citrulline to arginine (Cit/Arg)</b>                                              | Activity of NOS                                                        |
| <b>Ratio of citrulline to ornithine (Cit/Orn)</b>                                             | Activity of ornithine carbamoylphosphate transferase                   |
| <b>Ratio of ornithine to arginine (Orn/Arg)</b>                                               | Activity of arginase                                                   |
| <b>Ratio of tyrosine to phenylalanine (Tyr/Phe)</b>                                           | Activity of phenylalanine hydroxylase                                  |
| <b>Ratio of sulfoxidized methionine to total unmodified methionine (Met-SO/Met)</b>           | Measure of systemic oxidative stress                                   |
| <b>Ratio of kynurenine to tryptophan (Kyn/Trp)</b>                                            | Rate of tryptophan degradation to niacin (immunosuppression/tolerance) |
| <b>Ratio of serotonin to tryptophan (Serotonin/Trp)</b>                                       | Rate of tryptophan degradation to serotonin                            |
| <b>Ratio of putrescine to ornithine (Putrescine/Orn)</b>                                      | Activity of ornithine decarboxylase                                    |
| <b>Ratio of spermidine to putrescine (Putrescine/Spermidine)</b>                              | Activity of spermidine synthase                                        |
| <b>Ratio of spermine to spermidine (Spermine/Spermidine)</b>                                  | Activity of spermine synthase                                          |
| <b>Ratio of acetylcarnitine to free carnitine (C2/C0)</b>                                     | Measure of $\beta$ -oxidation of even numbered fatty acids (FA)        |
| <b>Ratio of short chain acylcarnitines to free carnitine ((C2+C3)/C0)</b>                     | Measure of overall $\beta$ -oxidation activity                         |
| <b>Ratio of long chain acylcarnitines to free carnitine ((C16+C18)/C0)</b>                    | Activity of carnitine palmitoyltransferase I                           |
| <b>Ratio of dicarboxy-acylcarnitines to total acylcarnitines (Total AC-DC/Total AC)</b>       | Indicator of $\omega$ -oxidation of FA.                                |
| <b>Sum of saturated FA in diacyl PC (SFA aa)</b>                                              | Indicator of lipid composition on SFA aa                               |
| <b>Sum of saturated FA in acyl-alkyl PC (SFA ae)</b>                                          | Indicator of lipid composition on SFA ae                               |
| <b>Sum of mono-unsaturated FA in diacyl PC (MUFA aa)</b>                                      | Indicator of lipid composition on MUFA aa                              |
| <b>Sum of mono-unsaturated FA in acyl-alkyl PC (MUFA ae)</b>                                  | Indicator of lipid composition on MUFA ae                              |
| <b>Sum of poly-unsaturated FA in diacyl PC (PUFA aa)</b>                                      | Indicator of lipid composition on PUFA aa                              |
| <b>Sum of poly-unsaturated FA in acyl-alkyl (PUFA ae)</b>                                     | Indicator of lipid composition on PUFA ae                              |
| <b>Unsaturated (MUFA+ PUFA) to saturated FA in diacyl PC (UFA/SFA aa)</b>                     | Measure of the activity of desaturases on diacyl PC                    |
| <b>Unsaturated (MUFA+ PUFA) to saturated FA in acyl-alkyl PC (UFA/SFA ae)</b>                 | Measure of the activity of desaturases on acyl-alkyl PC                |
| <b>Ratio of lysoglycerophosphocholines to glycerophosphocholines (Total lysoPC/ Total PC)</b> | Indicator of phospholipase activity                                    |

**Supplementary Table S2.** Ratios or sums of metabolites selected for their potential metabolic significance in the setting of cultured cells.

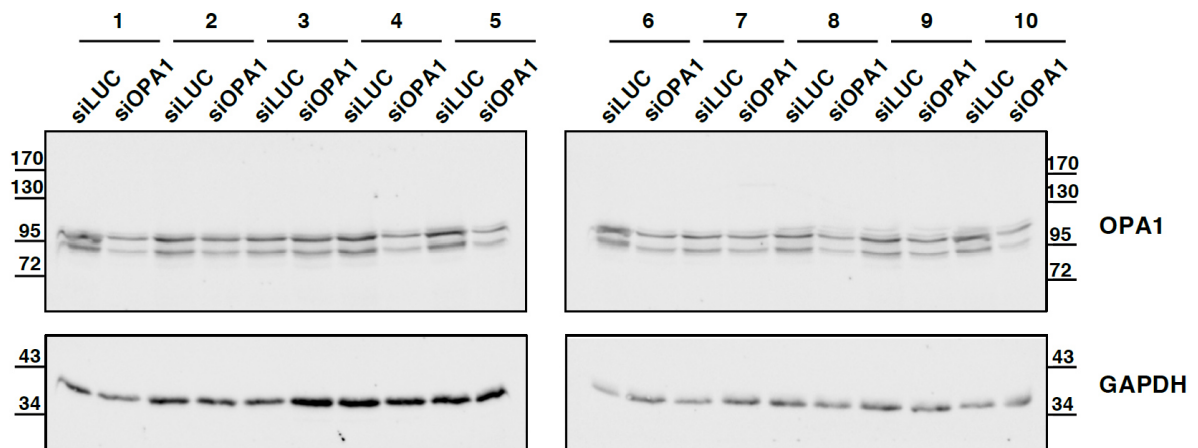

**Supplementary Fig. S3:** OPA1 (higher panel) and GAPDH (lower panel) cropped immunoblots showing at DIV9 the quantities of proteins in neurons transfected with siLUC or siOPA1 in 10 independent experiments. The two 9% polyacrylamid gels required for this analysis were processed in parallel and membranes were exposed with the same duration. The full length immunoblot is showed below.

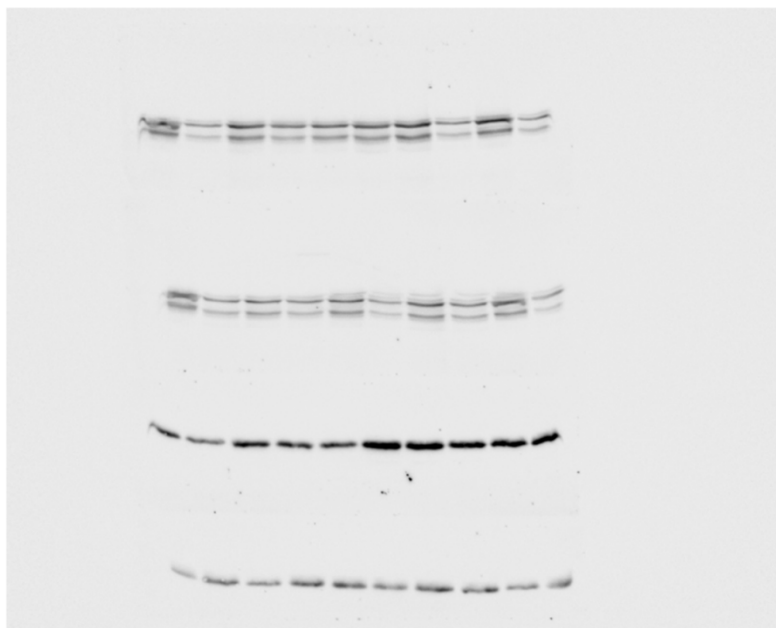

Supplement: 41598_2019_42554_MOESM1_ESM.pdf [file 41598_2019_42554_MOESM1_ESM.pdf]
